# Supplementary material for: Proteomic Profiling of Seminal Plasma Proteins in Varicocele Patients
Source: PubMed Central journal article supplement — World J Mens Health. 2019 Mar 15;39(1):90–8. doi: 10.5534/wjmh.180118 (PMC7752508; doi:10.5534/wjmh.180118), 2019-03-15
Supplement: wjmh-39-90-s001.pdf [file wjmh-39-90-s001.pdf]

**Supplementary Table 1.** Differentially expressed proteins selected for validation and the primary and secondary antibodies used in Western blotting

| Protein | Primary               |                |          | Secondary            |               |          |
|---------|-----------------------|----------------|----------|----------------------|---------------|----------|
|         | Antibody              | Manufacturer   | Dilution | Antibody             | Manufacturer  | Dilution |
| HSPA2   | Anti-Human Rabbit IgG | Abcam ab154374 | 1:1,000  | Anti-Rabbit Goat IgG | Abcam ab97051 | 1:10,000 |
| PRDX2   |                       | Abcam ab 71533 | 1:1,000  |                      |               |          |
| APOA2   |                       | Abcam ab92478  | 1:5,000  |                      |               |          |
| ACR     |                       | Abcam ab203289 | 1:500    |                      |               |          |
