# Supplementary material for: Proteomic Profiling of Seminal Plasma Proteins in Varicocele Patients
Source: PubMed Central journal article supplement — World J Mens Health. 2019 Mar 15;39(1):90–8. doi: 10.5534/wjmh.180118 (PMC7752508; doi:10.5534/wjmh.180118), 2019-03-15
Supplement: wjmh-39-90-s002.pdf [file wjmh-39-90-s002.pdf]

**Supplementary Table 2.** Semen parameters in healthy fertile men and infertile patients with varicocele

| Semen parameters                  | Fertile healthy men (n=10) | Varicocele patients (n=50) | p-value |
|-----------------------------------|----------------------------|----------------------------|---------|
| Sperm concentration ( $10^6$ /mL) | 69.90±37.65                | 29.49±33.22                | <0.002  |
| Sperm motility (%)                | 57.1±16.0                  | 41.3±18.4                  | <0.023  |
| Normal sperm morphology (%)       | 8.4±3.7                    | 2.4±1.9                    | <0.001  |
| ROS levels (RLU/s/ $10^6$ sperm)  | 142.7 (36.2, 337.7)        | 896.1 (165.6, 2,990.5)     | <0.008  |
| Sperm DNA fragmentation (%)       | 8.5 to 18.2                | 3.3 to 48.3                | <0.009  |

Data adapted from the study Agarwal et al (Asian J Androl 2016;18:282-91) [6]. Sperm concentration, motility and morphology values are presented as mean±standard deviation. ROS levels are mentioned as median (25th, 75th percentile), whereas sperm DNA fragmentation are represented as lower and upper limit. For all values,  $p < 0.05$  indicate a significant difference based on the Mann–Whitney test.

ROS: reactive oxygen species, RLU: relative light units.
